# Supplementary material
Source: PubMed Central journal article supplement (PMC6778701)
Supplement: NIHMS1038961-supplement-Supp_DataS1.pdf [file NIHMS1038961-supplement-Supp_DataS1.pdf]

# Supporting Information

*Hari Rallapalli*

## Contents

|                                                                                                         |           |
|---------------------------------------------------------------------------------------------------------|-----------|
| <b>Introduction</b>                                                                                     | <b>1</b>  |
| <b>Segmentation comparison - Manual vs Semi-automated</b>                                               | <b>2</b>  |
| Data import and summary of number of readers/images for method comparison . . . . .                     | 2         |
| Bland Altman analysis . . . . .                                                                         | 3         |
| <b>Raw aSmo progression data</b>                                                                        | <b>5</b>  |
| Data import and number of tumors studied in each model . . . . .                                        | 5         |
| Raw longitudinal progression data illustrates heterogeneity in tumor growth . . . . .                   | 7         |
| <b>Classification of raw progression - Are tumors ‘Progressing’ or ‘Non-progressing’?</b>               | <b>8</b>  |
| Empirical classification by means of a $7 \text{ mm}^3$ volume threshold at W7. . . . .                 | 8         |
| Linear discriminant analysis (LDA) based on early tumor progression features . . . . .                  | 11        |
| <b>Application - Preclinical trial of PLX5622</b>                                                       | <b>15</b> |
| Data import and summary of tumor stratification into treatment arms . . . . .                           | 15        |
| Raw longitudinal progression stratified by tumor model and treatment arm . . . . .                      | 16        |
| Pre-treatment tumor volumes did not differ significantly across treatment arms nor tumor models         | 17        |
| Response to therapy is heterogeneous and tumor model-dependent . . . . .                                | 18        |
| Effects of treatment on endpoint tumor volume reinforce this differential response . . . . .            | 19        |
| Statistical power calculations for PLX5622 preclinical trial - after empirical classification . . . . . | 20        |
| <b>Reclassification of PLX5622 preclinical trial data using trained LDA classifier</b>                  | <b>24</b> |
| LDA criteria produce similar results to empirical classification . . . . .                              | 24        |
| Effects of treatment on endpoint tumor volume after LDA reclassification . . . . .                      | 28        |
| Statistical power calculations after LDA reclassification . . . . .                                     | 29        |

## Introduction

This document details the analyses run to produce the statistics and main figures for the tumor imaging pipeline paper. The relevant raw data in .csv format are available on request:

1. “SASRESULTS.csv” - This file contains manual and semi-automated segmentation data
2. “SMO Tumor Segmentations” - This file contains the semi-automated segmentation data from the aSmo tumors used to train the empirical and linear discriminant classifiers

3. “PLX Tumor Segmentations” - This file contains the semi-automated segmentation data from the aSmo tumors entered into the PLX5622 preclinical trial

We will start by comparing semi-automated segmentation to manual segmentation:

```
suppressMessages({
  require(ggplot2)
  require(lmerTest)
  require(tidyverse)
  require(ggpubr)
  require(ggthemes)
  require(BlandAltmanLeh)
  require(MASS)
  require(FactoMineR)
  require(multcomp)
  require(pwr)
  require(cowplot)
  require(gridExtra)
  require(caret)
})

select <- dplyr::select

# plot theme (?)

plottheme <- theme_pubr() +
  theme(
    strip.background = element_blank(),
    panel.grid.major = element_blank(),
    panel.grid.minor = element_blank(),
    panel.background = element_rect(fill = "transparent", colour = NA),
    plot.background = element_rect(fill = "transparent", colour = NA),
    axis.line = element_line(size = 1, color = "black"),
    axis.text = element_text(face = "bold", size = "17", color = "black"),
    axis.title = element_text(face = "bold", size = "19", color = "black"),
    axis.title.x = element_text(face = "bold", size = "19", color = "black"),
    axis.title.y = element_text(face = "bold", size = "19", color = "black"),
    strip.text = element_text(face = "bold", size = "17", color = "black"),
    legend.text = element_text(face = "bold", size = "17", color = "black"),
    legend.title = element_text(face = "bold", size = "17", color = "black"),
    legend.position = "right",
    legend.background = element_rect(fill = "transparent", colour = NA)
  )
```

## Segmentation comparison - Manual vs Semi-automated

Data import and summary of number of readers/images for method comparison

```
df <- read_csv('/media/sf_MINCVI/SMO-Tumor-Data/SASRESULTS.csv') %>%
gather(
  READER,
  MEASUREMENTS,
  READER1,
  READER2,
  READER3,
  READER4,
  READER5,
  READER6,
  READER7,
  READER8
) %>% arrange(READER)
```

## Bland Altman analysis

Manual to semi-automated segmentation method comparisons are made by both linear comparison, and difference comparisons (Bland Altman analysis).

```
dfR1 <- df %>%
mutate (normdiffmeas = (MEASUREMENTS - MANUALVOLUME) / MANUALVOLUME) %>%
filter(READER == "READER1" | READER == "READER4")

sasplotaccuracy <- df %>% ggplot() +
aes(x = MANUALVOLUME, y = MEASUREMENTS, color = READER) +
geom_jitter(size = 5,
alpha = 0.7,
shape = 16) +
geom_abline(
  intercept = 0,
  slope = 1,
  color = "black",
  linetype = "dashed",
  size = 1
) +
geom_point(
  data = dfR1,
  shape = 21,
  size = 5.5,
  stroke = 1,
  color = "black"
) +
plottheme +
scale_fill_colorblind() +
coord_fixed(ratio = .75) +
ylab(bquote(bold('Semi-automated segmented volume' ~ (mm ^ 3)))) +
xlab(bquote(bold('Manually segmented volume' ~ (mm ^ 3)))) +
geom_abline(intercept = -0.18257,
slope = 1.13338,
color = "red") +
xlim(0, 80) +
```

```

scale_color_discrete(
  "READER",
  labels = c(
    "READER1" = "R1",
    "READER2" = "R2",
    "READER3" = "R3",
    "READER4" = "R4",
    "READER5" = "R5",
    "READER6" = "R6",
    "READER7" = "R7",
    "READER8" = "R8"
  )
)

sasreg <- lm(MEASUREMENTS ~ MANUALVOLUME, data = df)

summary(sasreg)

```

```

##
## Call:
## lm(formula = MEASUREMENTS ~ MANUALVOLUME, data = df)
##
## Residuals:
##      Min       1Q   Median       3Q      Max
## -8.8057 -2.7898 -0.1717  2.1666 13.7010
##
## Coefficients:
##              Estimate Std. Error t value Pr(>|t|)
## (Intercept)  -0.18257    0.80837  -0.226   0.822
## MANUALVOLUME  1.13338    0.02615  43.349 <2e-16 ***
## ---
## Signif. codes:  0 '***' 0.001 '**' 0.01 '*' 0.05 '.' 0.1 ' ' 1
##
## Residual standard error: 4.217 on 78 degrees of freedom
## Multiple R-squared:  0.9601, Adjusted R-squared:  0.9596
## F-statistic: 1879 on 1 and 78 DF,  p-value: < 2.2e-16

```

```

sasplotaccuracy

```

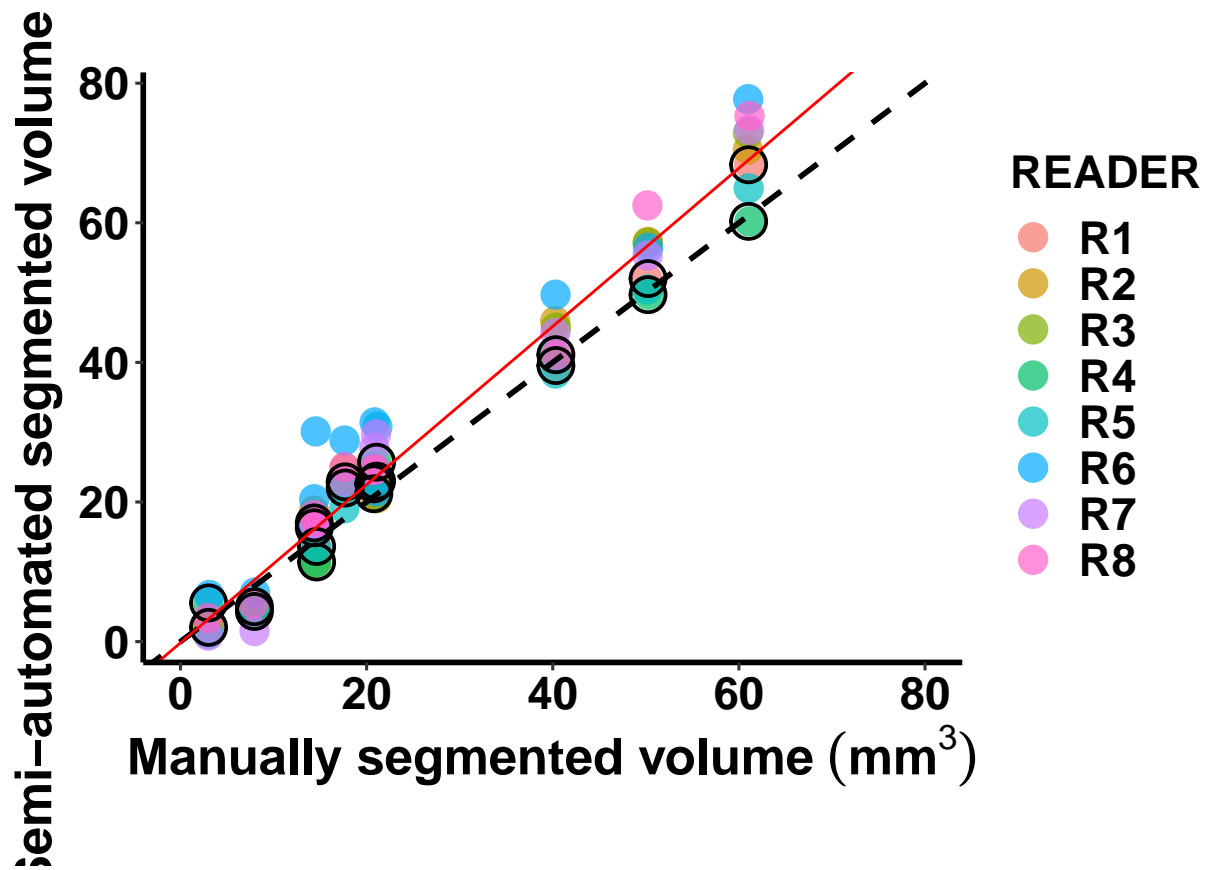

```

sasblandaltmanstats <-
  bland.altman.stats(df$MEASUREMENTS, df$MANUALVOLUME)

sasblandaltmanstats$CV =
  sasblandaltmanstats$critical.diff / 1.96 / sasblandaltmanstats$mean.diffs

```

## Raw aSmo progression data

In an effort to study and parse the heterogeneity in progression of aSmo tumors, cohorts of aSmo-1 and aSmo-5 tumors were generated and studied with our pipeline.

## Data import and number of tumors studied in each model

```

gf <-
  read_csv('/media/sf_MINCV/SMO-Tumor-Data/SMO Tumor Segmentations.csv') %>%
  select(MODEL, BATCH, ID, WEEK, HEMISPHERE, SEX, VOXELS, VOLUMES) %>%
  mutate(
    MOUSEID = paste(BATCH, ID),
    TUMORID = paste(MODEL, MOUSEID, HEMISPHERE),
    TIMEPOINT = parse_number(WEEK)
  ) %>%

```

```

group_by(TUMORID) %>%
arrange(TIMEPOINT) %>%
mutate(VOLCHANGE = last(VOLUMES) - nth(VOLUMES, 2),
OUTCOME = factor(ifelse(
VOLCHANGE > 0, "Progressing", "Non-progressing"
)))

metcutoff = gf %>% filter(TIMEPOINT == 7, VOLUMES > 7) %>% select(TUMORID)

gf <-
gf %>% mutate(CLASSES = as.factor(
ifelse(
VOLCHANGE > 0 &
is.element(TUMORID, metcutoff$TUMORID) == TRUE,
'Progressing',
ifelse(
VOLCHANGE < 0 &
is.element(TUMORID, metcutoff$TUMORID) == FALSE &
TIMEPOINT > 0,
'Non-progressing',
'Misclassified'
)
)
))

gf <- gf %>%
mutate(W5VOLUMES = nth(VOLUMES, 1),
W7VOLUMES = nth(VOLUMES, 2)) %>%
mutate(
VOLUMECHANGE = W7VOLUMES - W5VOLUMES,
NORMALIZEDGROWTHRATE = VOLUMECHANGE / (2 * W5VOLUMES)
)

is.na(gf) <- sapply(gf, is.infinite)

gf$INFINITYCHECK = is.na(gf$NORMALIZEDGROWTHRATE)

gf[is.na(gf)] <- 1000

modellabels = c("SMO1" = "aSmo-1", "SMO5" = "aSmo-5")

gf %>% group_by(MODEL) %>%
summarize(Number_of_tumors = n_distinct(TUMORID)) %>%
knitr::kable()

```

| MODEL | Number_of_tumors |
|-------|------------------|
| SMO1  | 20               |
| SMO5  | 42               |

Raw longitudinal progression data illustrates heterogeneity in tumor growth

```
smorawprogressionplot <- gf %>%  
  ggplot() +  
  aes(x = TIMEPOINT, y = VOLUMES, group = TUMORID) +  
  geom_line() +  
  plottheme +  
  xlab("Timepoint (Weeks)") +  
  ylab(bquote(bold('Tumor Volume' ~ (mm ^ 3)))) +  
  facet_wrap( ~ MODEL,  
    labeller = labeller(MODEL = modellabels),  
    scales = "free") +  
  theme(strip.text = element_text(face = "bold.italic")) +  
  scale_x_continuous(breaks = c(5, 7, 9, 11, 13)) +  
  scale_y_continuous(limits = c(0, 170))  
  
smorawprogressionplot
```

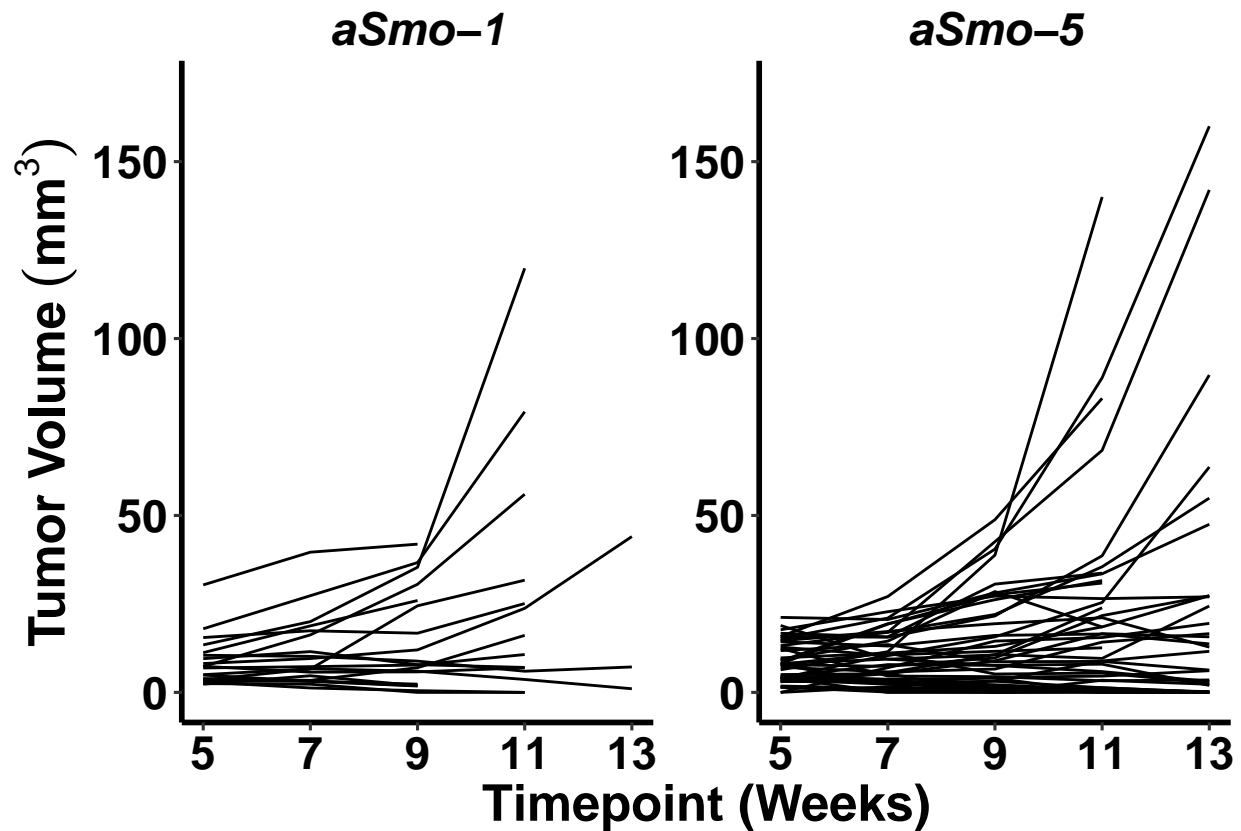

## Classification of raw progression - Are tumors 'Progressing' or 'Non-progressing'?

Empirical classification by means of a  $7 \text{ mm}^3$  volume threshold at W7.

```
gfSM01 <-
  gf %>% distinct(TUMORID, .keep_all = TRUE) %>% filter(MODEL == "SM01")

sm01simpleclassificationW7plot <-
  gf %>% distinct(TUMORID, .keep_all = TRUE) %>% filter(MODEL == "SM01") %>%
  ggplot +
  aes(x = MODEL, y = W7VOLUMES, color = CLASSES) +
  geom_jitter(
    data = subset(gfSM01, CLASSES == "Misclassified"),
    width = 0.5,
    size = 2,
    shape = 21,
    stroke = 2
  ) +
  geom_jitter(
    data = subset(gfSM01, CLASSES != "Misclassified"),
    width = 0.5,
    size = 3,
    shape = 16,
    stroke = 2
  ) +
  plottheme +
  scale_color_manual("Empirical Prediction", values = c("black", "red", "blue")) +
  geom_hline(yintercept = 7, linetype = "dashed") +
  theme(legend.position = "right", axis.text.x = element_blank()) +
  ylab(bquote(bold('Tumor Volume' ~ (mm ^ 3)))) +
  xlab(bquote(bold('W7'))) +
  ggtitle('aSm0-1') +
  theme(plot.title = element_text(face = "bold.italic")) +
  ylim(c(-1, 40))

sm01simpleclassificationW7plot
```



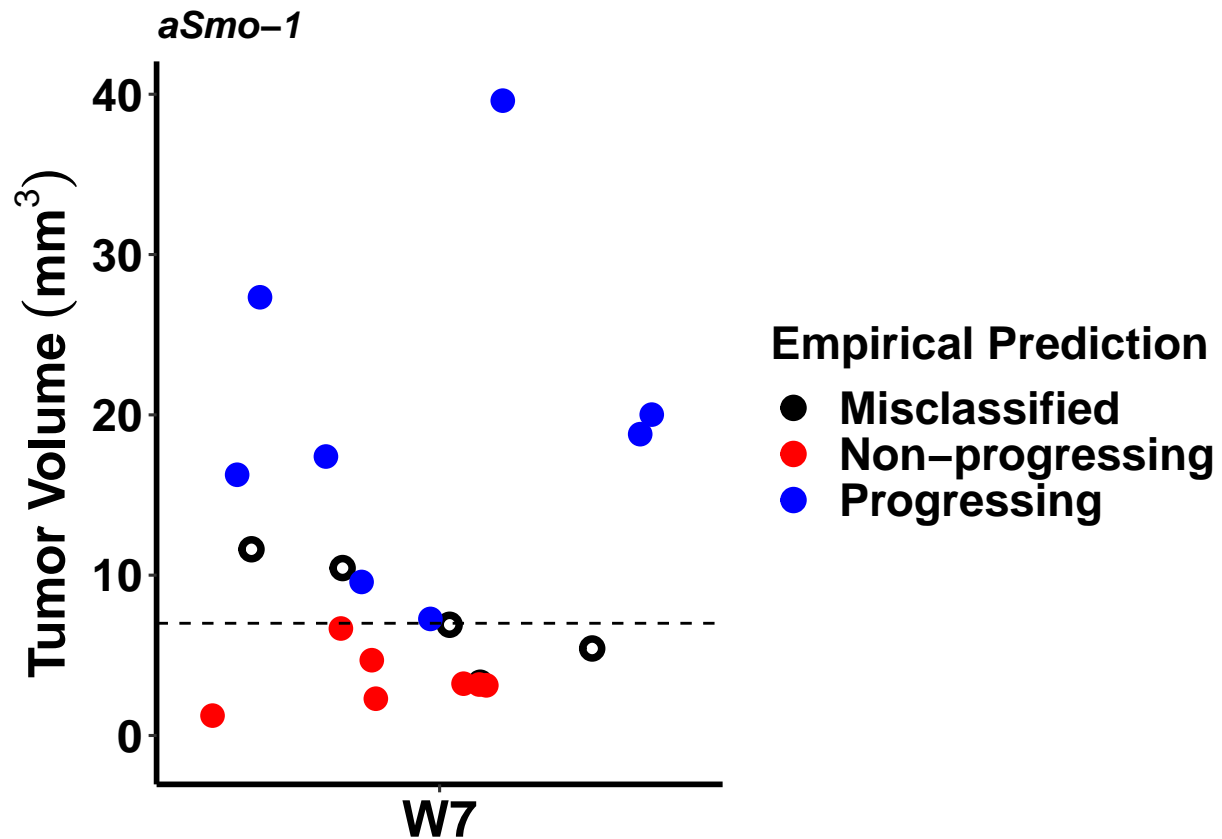

```
gfSM05 <-
gf %>% distinct(TUMORID, .keep_all = TRUE) %>% filter(MODEL == "SM05")

smo5simpleclassificationW7plot <-
gf %>% distinct(TUMORID, .keep_all = TRUE) %>% filter(MODEL == "SM05") %>%
ggplot +
aes(x = MODEL, y = W7VOLUMES, color = CLASSES) +
geom_jitter(
data = subset(gfSM05, CLASSES == "Misclassified"),
width = 0.5,
size = 2,
shape = 21,
stroke = 2
) +
geom_jitter(
data = subset(gfSM05, CLASSES != "Misclassified"),
width = 0.5,
size = 3,
shape = 16,
stroke = 2
) +
plottheme +
scale_color_manual("Empirical Prediction", values = c("black", "red", "blue")) +
geom_hline(yintercept = 7, linetype = "dashed") +
theme(legend.position = "right", axis.text.x = element_blank()) +
ylab(bquote(bold('Tumor Volume' ~ (mm ^ 3)))) +
xlab(bquote(bold('W7')))
```

```
ggtitle('aSmo-5') +
theme(plot.title = element_text(face = "bold.italic")) +
ylim(c(-1, 40))
```

smo5simpleclassificationW7plot

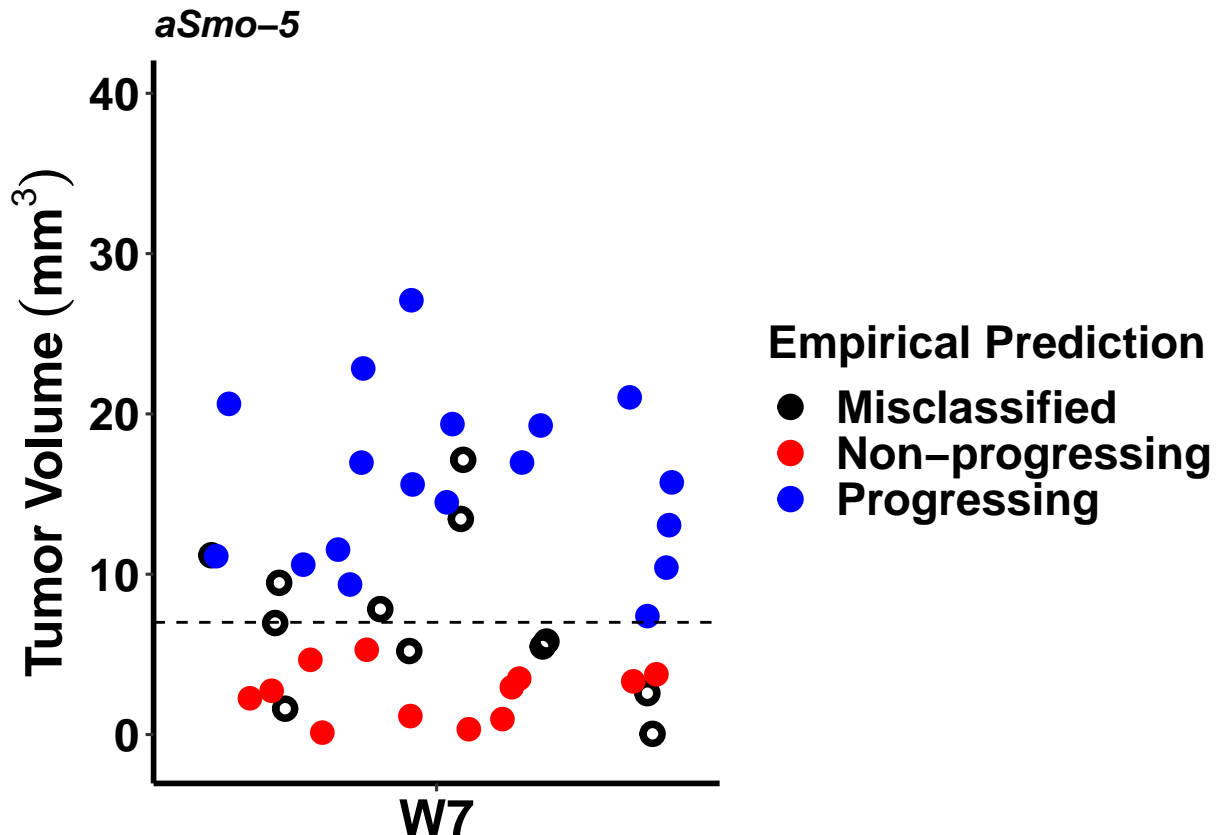

```
smosimpleclassificationplot <- gf %>%
  ggplot() +
  aes(
    x = TIMEPOINT,
    y = VOLUMES,
    group = TUMORID,
    color = CLASSES
  ) +
  geom_line() +
  plottheme +
  scale_color_manual("Empirical Prediction", values = c("#666666", "red", "blue")) +
  geom_hline(yintercept = 7, linetype = "dashed") +
  theme(legend.position = "right") +
  xlab("Timepoint (Weeks)") +
  ylab(bquote(bold('Tumor Volume' ~ (mm ^ 3)))) +
  facet_wrap( ~ MODEL,
    labeller = labeller(MODEL = modellabels),
    scales = "free") +
```

```
theme(strip.text = element_text(face = "bold.italic")) +
scale_x_continuous(breaks = c(5, 7, 9, 11, 13)) +
scale_y_continuous(limits = c(0, 170))
```

smosimpleclassificationplot

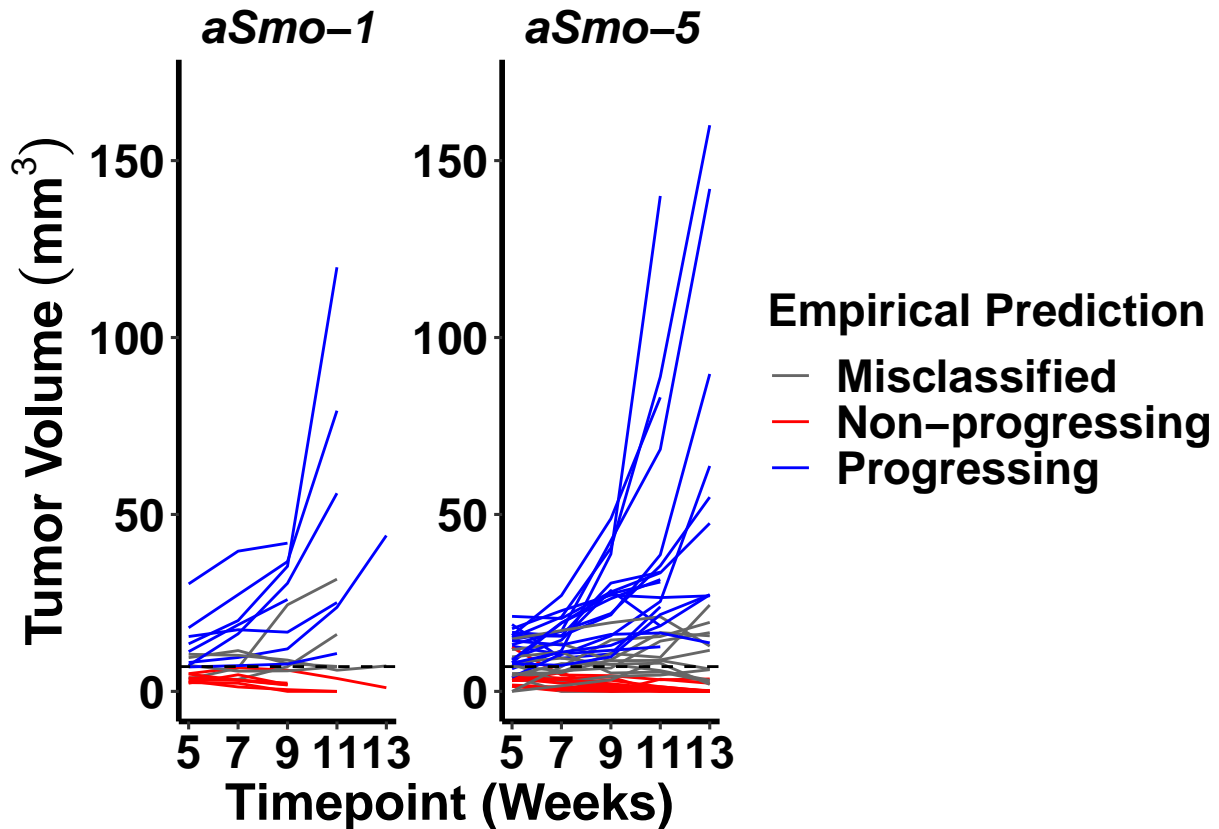

Linear discriminant analysis (LDA) based on early tumor progression features

```
reg <-
gf %>% lda(
  OUTCOME ~ W7VOLUMES + VOLUMECHANGE + NORMALIZEDGROWTHRATE + INFINITYCHECK,
  data = .,
  na.action = "na.omit"
)

regCV <-
gf %>% lda(
  OUTCOME ~ W7VOLUMES + VOLUMECHANGE + NORMALIZEDGROWTHRATE + INFINITYCHECK,
  data = .,
  na.action = "na.omit",
  CV = TRUE
)
```

```
reg
```

```
## Call:
## lda(OUTCOME ~ W7VOLUMES + VOLUMECHANGE + NORMALIZEDGROWTHRATE +
##     INFINITYCHECK, data = ., na.action = "na.omit")
##
## Prior probabilities of groups:
## Non-progressing      Progressing
##      0.4244604      0.5755396
##
## Group means:
##           W7VOLUMES VOLUMECHANGE NORMALIZEDGROWTHRATE
## Non-progressing  5.367661  -0.04005085      -0.03168919
## Progressing     12.919813   2.51906250      62.61649404
##           INFINITYCHECKTRUE
## Non-progressing           0.0000
## Progressing              0.0625
##
## Coefficients of linear discriminants:
##           LD1
## W7VOLUMES      0.1745186
## VOLUMECHANGE  -0.1698068
## NORMALIZEDGROWTHRATE  1.8210264
## INFINITYCHECKTRUE -1817.5314066
```

```
res <- table(gf$OUTCOME, regCV$class)
print('Classification Accuracy:')
```

```
## [1] "Classification Accuracy:"
```

```
diag(prop.table(res, 1))
```

```
## Non-progressing      Progressing
##      0.6440678      0.7375000
```

```
preg <- predict(object = reg, newdata = gf)
```

```
gf$LDA_PREDICTION = preg$class
```

```
gf %>% group_by(LDA_PREDICTION, MODEL, OUTCOME) %>%
  summarize(n = n_distinct(TUMORID)) %>%
  spread(MODEL, n) %>%
  knitr::kable()
```

| LDA_PREDICTION  | OUTCOME         | SMO1 | SMO5 |
|-----------------|-----------------|------|------|
| Non-progressing | Non-progressing | 6    | 11   |
| Non-progressing | Progressing     | 3    | 6    |
| Progressing     | Non-progressing | 3    | 6    |
| Progressing     | Progressing     | 8    | 19   |

```

smolregplot <- gf %>% filter(MODEL == "SMO1") %>% ggplot() +
aes(
x = W7VOLUMES,
y = VOLUMECHANGE,
shape = OUTCOME,
color = LDA_PREDICTION
) +
geom_point(size = 3, stroke = 2) +
plottheme +
theme(legend.position = "right") +
geom_vline(xintercept = 7, linetype = "dashed") +
scale_color_manual("LDA Prediction", values = c("red", "blue")) +
scale_shape("Outcome") +
guides(color = guide_legend(order = 2),
shape = guide_legend(order = 1)) +
xlab(bquote(bold('W7 Tumor Volume' ~ (mm ^ 3)))) +
ylab(bquote(bold('Volume Change' ~ (mm ^ 3)))) +
ggtitle('aSmo-1') +
theme(plot.title = element_text(face = "bold.italic")) +
coord_cartesian(xlim = c(0, 40), ylim = c(-10, 15))

```

smolregplot

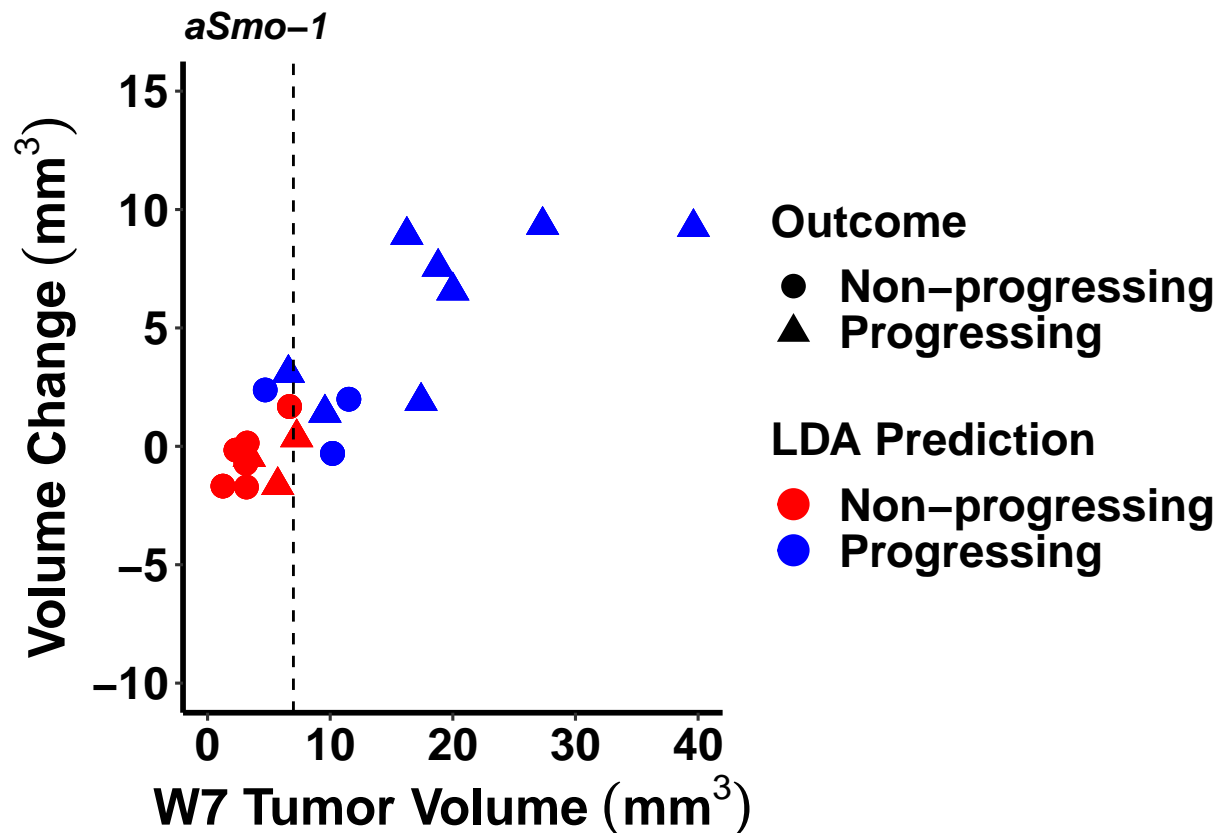

```

smo5regplot <- gf %>% filter(MODEL == "SMO5") %>% ggplot() +
aes(

```

```

x = W7VOLUMES,
y = VOLUMECHANGE,
shape = OUTCOME,
color = LDA_PREDICTION
) +
geom_point(size = 3, stroke = 2) +
plottheme +
theme(legend.position = "right") +
geom_vline(xintercept = 7, linetype = "dashed") +
scale_color_manual("LDA Prediction", values = c("red", "blue")) +
scale_shape("Outcome") +
guides(color = guide_legend(order = 2),
shape = guide_legend(order = 1)) +
xlab(bquote(bold('W7 Tumor Volume' ~ (mm ^ 3)))) +
ylab(bquote(bold('Volume Change' ~ (mm ^ 3)))) +
ggtitle('aSmo-5') +
theme(plot.title = element_text(face = "bold.italic")) +
coord_cartesian(xlim = c(0, 40), ylim = c(-10, 15))

```

smo5regplot

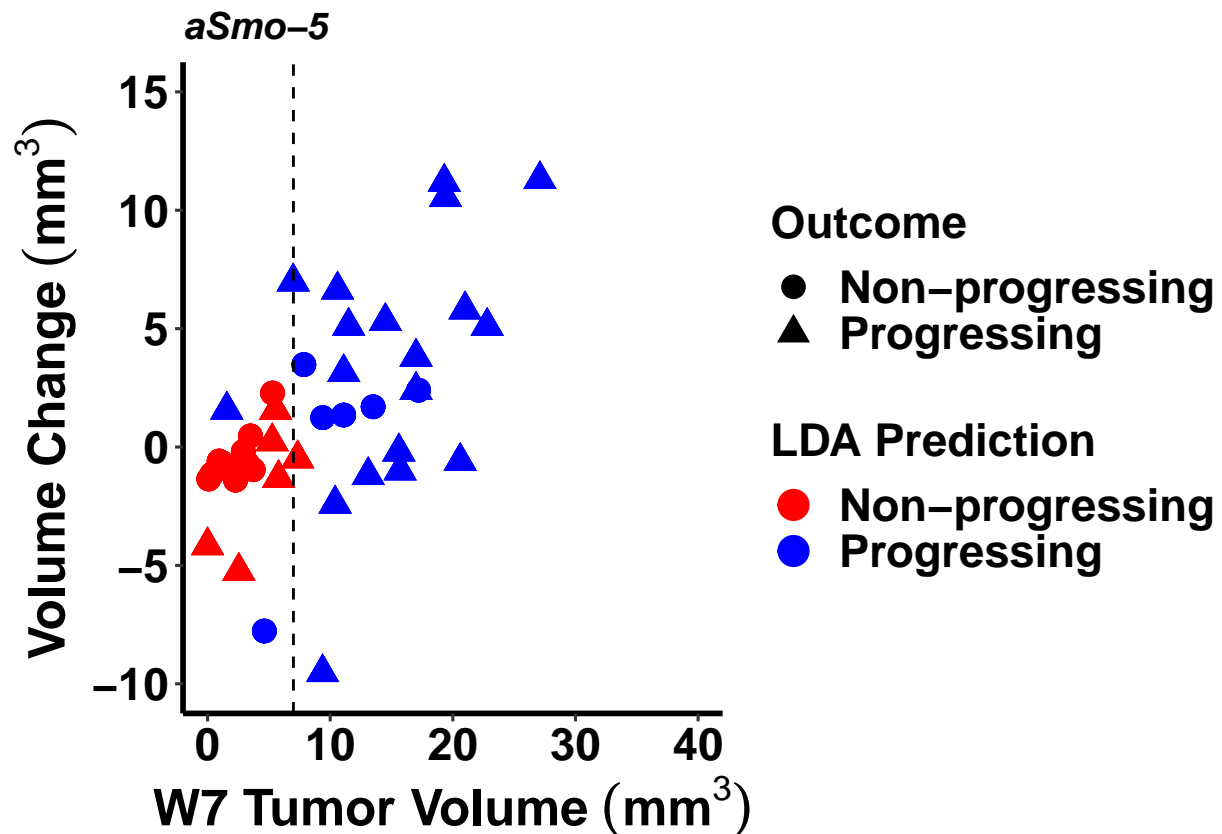

## Application - Preclinical trial of PLX5622

### Data import and summary of tumor stratification into treatment arms

```
plxf <-
  read_csv('/media/sf_MINCVN/SMO-Tumor-Data/PLX Tumor Segmentations.csv') %>%
  select(MODEL,
         BATCH,
         ID,
         WEEK,
         HEMISPHERE,
         SEX,
         VOXELS,
         VOLUMES,
         TREATMENT,
         TREATMENTSTART) %>%
  mutate(
    MOUSEID = paste(BATCH, ID),
    TUMORID = paste(MODEL, MOUSEID, HEMISPHERE),
    TIMEPOINT = parse_number(WEEK)
  ) %>%
  group_by(TUMORID) %>%
  arrange(TIMEPOINT) %>%
  mutate(
    VOLCHANGE = last(VOLUMES) - nth(VOLUMES, 2),
    FINALVOLUME = last(VOLUMES),
    PRETREATMENTVOLUME = nth(VOLUMES, 2),
    OUTCOME = as.factor(ifelse(
      VOLCHANGE > 0, "Progressing", "Non-progressing"
    ))
  )

metcutoff <-
plxf %>% arrange(TIMEPOINT) %>% filter(TIMEPOINT == nth(TIMEPOINT, 2) &
  VOLUMES > 7) %>% select(TUMORID)

plxf <-
plxf %>% mutate(CLASSES = as.factor(
  ifelse(
    VOLCHANGE > 0 &
    is.element(TUMORID, metcutoff$TUMORID) == TRUE,
    'non-responding',
    ifelse(
      VOLCHANGE < 0 &
      is.element(TUMORID, metcutoff$TUMORID) == FALSE &
      TIMEPOINT > 0,
      'falsely included',
      'responded'
    )
  )
))
```

```

plxf <- plxf %>%
mutate(W5VOLUMES = nth(VOLUMES, 1),
W7VOLUMES = nth(VOLUMES, 2)) %>%
mutate(
VOLUMECHANGE = W7VOLUMES - W5VOLUMES,
NORMALIZEDGROWTHRATE = VOLUMECHANGE / (2 * W5VOLUMES)
)

is.na(plxf) <- sapply(plxf, is.infinite)
plxf$INFINITYCHECK = is.na(plxf$NORMALIZEDGROWTHRATE)
plxf[is.na(plxf)] <- 1000

plxf %>% group_by(MODEL, TREATMENT) %>% filter(W7VOLUMES >= 7) %>%
summarize(n = n_distinct(TUMORID)) %>%
spread(MODEL, n) %>%
knitr::kable()

```

| TREATMENT | SMO1 | SMO5 |
|-----------|------|------|
| CTL       | 13   | 12   |
| PLX       | 13   | 14   |

## Raw longitudinal progression stratified by tumor model and treatment arm

```

plxsimpleclassificationplot.bothmodels <-
plxf %>% filter(TREATMENT != "U" &&
W7VOLUMES >= 7) %>% filter(CLASSES != "falsely included") %>%
ggplot() +
aes(
x = TIMEPOINT,
y = VOLUMES,
group = TUMORID,
color = TREATMENT
) +
geom_line() +
plottheme +
scale_color_manual("Treatment", values = c("blue", "red")) +
facet_wrap( ~ MODEL,
labeller = labeller(MODEL = modellabels),
scales = "free") +
scale_x_continuous(breaks = c(5, 7, 9, 11, 13, 15, 17)) +
geom_hline(yintercept = 7,
size = 1,
linetype = 'dashed') +
xlab("Timepoint (Weeks)") +
ylab(bquote(bold('Tumor Volume' ~ (mm ^ 3)))) +
theme(strip.text = element_text(face = "bold.italic"),
legend.position = "right")

```



```
plxsimpleclassificationplot.bothmodels
```

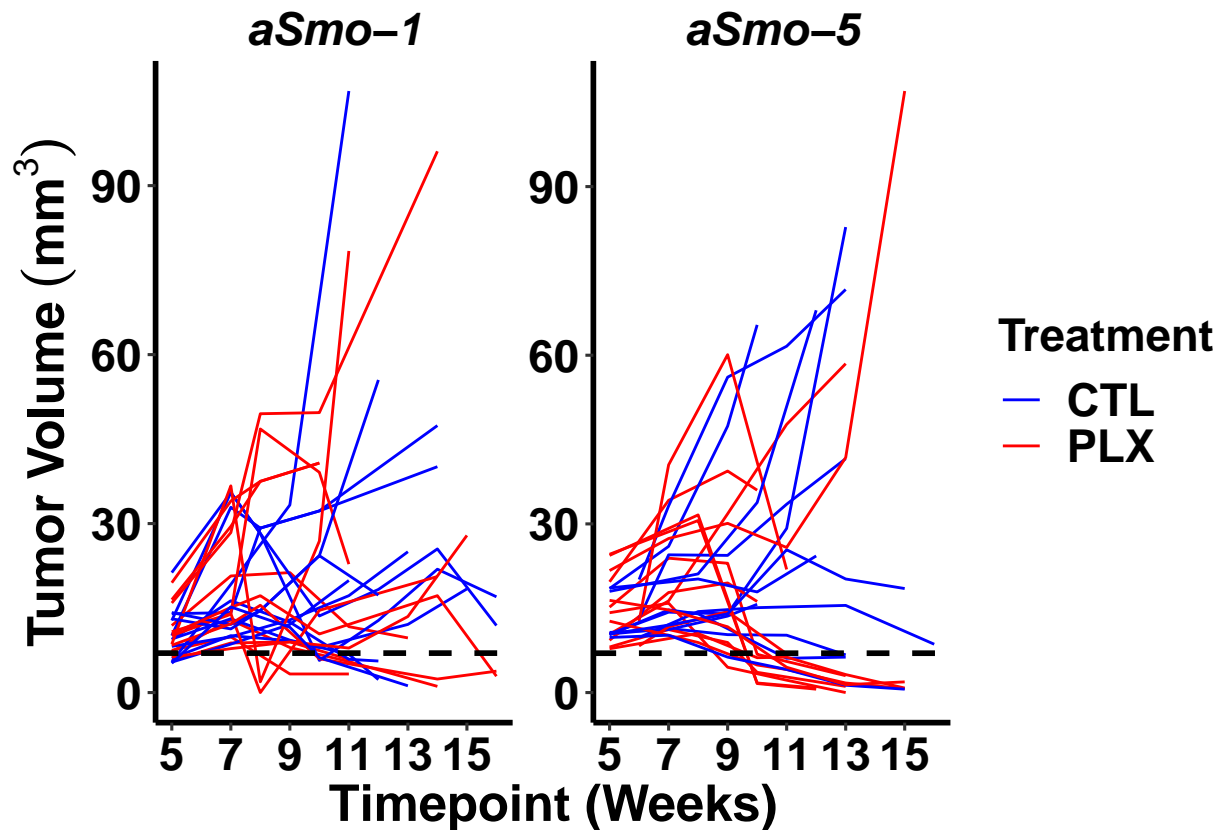

Pre-treatment tumor volumes did not differ significantly across treatment arms nor tumor models

```
plxpretreatmentvolumes <-  
  plxf %>% distinct(TUMORID, .keep_all = TRUE) %>% filter(TREATMENT != "U") %>%  
  filter(W7VOLUMES >= 7) %>% filter(CLASSES != "falsely included") %>%  
  filter(TIMEPOINT <= 13) %>%  
  ggplot() +  
  aes(x = TREATMENT, y = W7VOLUMES) +  
  geom_boxplot(outlier.shape = NA) +  
  geom_jitter(  
    shape = 21,  
    stroke = 1,  
    width = 0.2,  
    size = 3  
  ) +  
  plottheme +  
  scale_color_manual("Treatment", values = c("blue", "red")) +  
  facet_wrap(~ MODEL, labeller = labeller(MODEL = modellabels)) +  
  xlab("Treatment Arm") +  
  ylab(bquote(italic('Pre-treatment Tumor Volume' ~ (mm ^ 3)))) +  
  theme(strip.text = element_text(face = "bold.italic"),
```

```
legend.position = c(0.95, 0.5))
```

```
plxpretreatmentvolumes
```

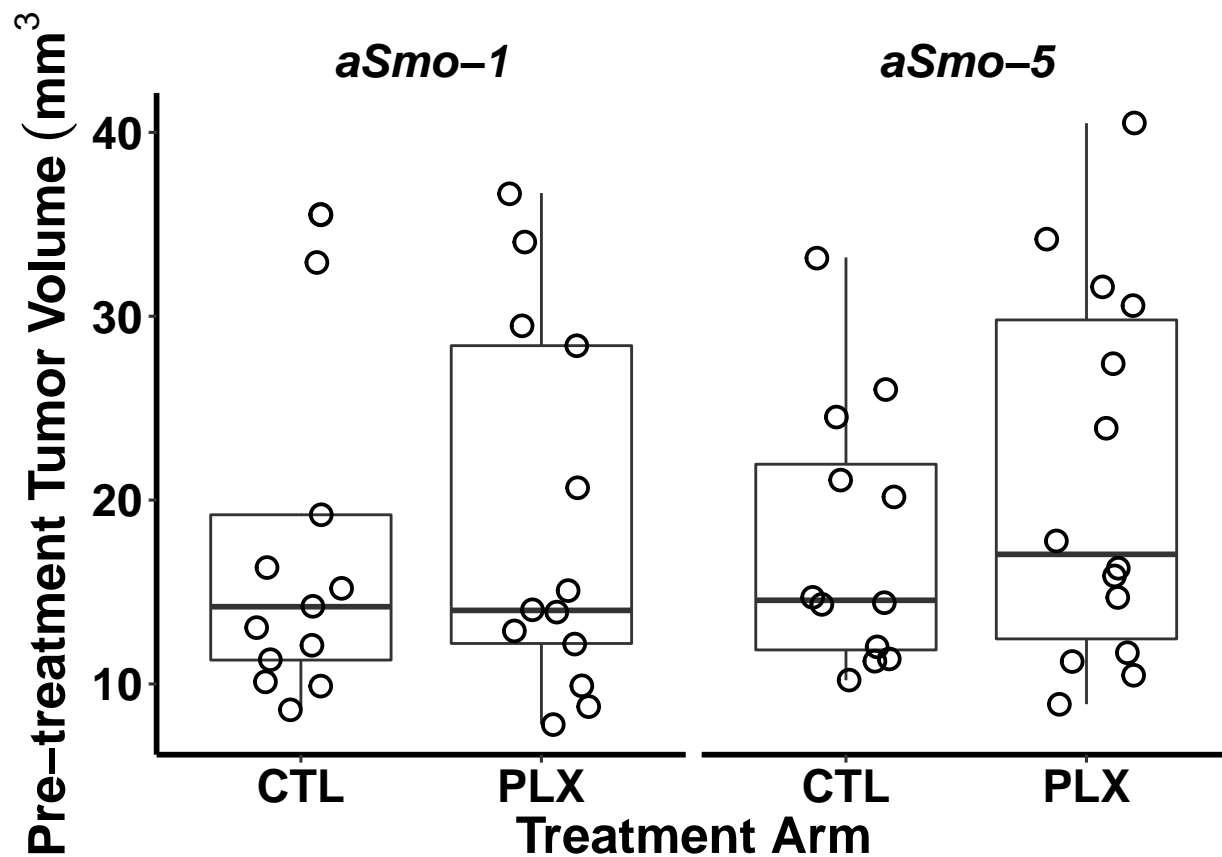

Response to therapy is heterogeneous and tumor model-dependent

```
plxsimpleclassificationsmooth.bothmodels <-  
  plxf %>% filter(TREATMENT != "U") %>% filter(W7VOLUMES >= 7) %>%  
  filter(CLASSES != "falsely included") %>% filter(TIMEPOINT <= 13) %>%  
  ggplot() +  
  aes(x = TIMEPOINT, y = VOLUMES, color = TREATMENT) +  
  # geom_smooth(formula = "y ~ poly(x,1)", span = 1) +  
  geom_smooth(method = lm, formula = y ~ splines::bs(x, 3)) +  
  plottheme +  
  scale_color_manual("Treatment", values = c("blue", "red")) +  
  facet_wrap( ~ MODEL,  
    labeller = labeller(MODEL = modellabels),  
    scales = "free") +  
  coord_cartesian(xlim = c(5, 13), ylim = c(-5, 40)) +  
  scale_x_continuous(breaks = c(5, 7, 9, 11, 13, 15, 17)) +  
  scale_y_continuous(breaks = c(-20, -10, 0, 10, 20, 30, 40)) +  
  xlab("Timepoint (Weeks)") +
```

```
ylab(bquote(bold('Tumor Volume' ~ (mm ^ 3)))) +
theme(strip.text = element_text(face = "bold.italic"))
```

```
plxsimpleclassificationsmooth.bothmodels
```

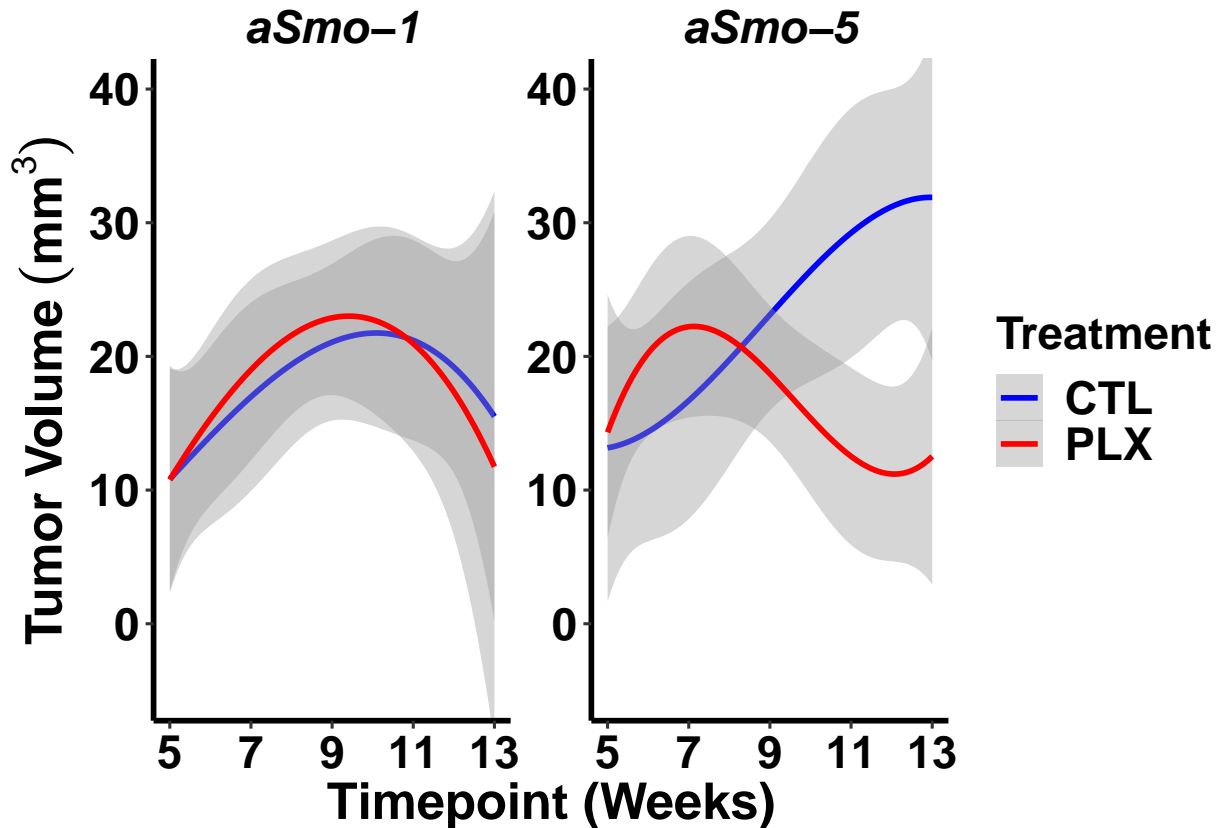

Effects of treatment on endpoint tumor volume reinforce this differential response

```
plxmodel <-
  plxf %>% filter(TREATMENT != "U") %>% filter(W7VOLUMES >= 7) %>%
  filter(TIMEPOINT == 5 | TIMEPOINT == 6) %>%
  lmerTest::lmer(FINALVOLUME ~ PRETREATMENTVOLUME + MODEL:TREATMENT + (1 |
  MOUSEID) + 0,
  data = .)

summary(plxmodel, ddf = "Kenward-Roger")
```

```
## Linear mixed model fit by REML. t-tests use Kenward-Roger's method [
## lmerModLmerTest]
## Formula:
## FINALVOLUME ~ PRETREATMENTVOLUME + MODEL:TREATMENT + (1 | MOUSEID) +
## 0
## Data: .
```

```

##
## REML criterion at convergence: 463.8
##
## Scaled residuals:
##      Min       1Q   Median       3Q      Max
## -1.2447 -0.6075 -0.2039  0.1778  2.7757
##
## Random effects:
##   Groups   Name      Variance Std.Dev.
##  MOUSEID (Intercept) 90.52    9.514
##   Residual          681.12   26.098
## Number of obs: 52, groups:  MOUSEID, 30
##
## Fixed effects:
##              Estimate Std. Error      df t value Pr(>|t|)
## PRETREATMENTVOLUME      1.3783    0.4463  44.8093   3.088  0.00345 **
## MODELSM01:TREATMENTCTL    3.4125   11.3429  37.2509   0.301  0.76520
## MODELSM05:TREATMENTCTL    9.2684   11.5638  34.0453   0.802  0.42840
## MODELSM01:TREATMENTPLX    1.1748   11.5991  37.2238   0.101  0.91987
## MODELSM05:TREATMENTPLX  -10.8190   12.2540  33.6510  -0.883  0.38356
## ---
## Signif. codes:  0 '***' 0.001 '**' 0.01 '*' 0.05 '.' 0.1 ' ' 1
##
## Correlation of Fixed Effects:
##              PRETRE MODELSM01:TREATMENTC MODELSM05:TREATMENTC
## MODELSM01:TREATMENTC -0.688
## MODELSM05:TREATMENTC -0.669  0.460
## MODELSM01:TREATMENTP -0.703  0.484                0.471
## MODELSM05:TREATMENTP -0.754  0.518                0.504
##
##              MODELSM01:TREATMENTP
## MODELSM01:TREATMENTC
## MODELSM05:TREATMENTC
## MODELSM01:TREATMENTP
## MODELSM05:TREATMENTP  0.530

```

## Statistical power calculations for PLX5622 preclinical trial - after empirical classification

```

plxpw <- data.frame(
  n1 = plxf %>% filter(TREATMENT == "PLX") %>% filter(W7VOLUMES >= 7) %>%
  distinct(TUMORID, .keep_all = TRUE) %>%
  ungroup() %>% select(FINALVOLUME) %>% nrow(),
  n2 = plxf %>% filter(TREATMENT == "CTL") %>% filter(W7VOLUMES >= 7) %>%
  distinct(TUMORID, .keep_all = TRUE) %>%
  ungroup() %>% select(FINALVOLUME) %>% nrow(),
  M1 = plxf %>% filter(TREATMENT == "PLX") %>% filter(W7VOLUMES >= 7) %>%
  distinct(TUMORID, .keep_all = TRUE) %>%
  ungroup() %>% select(FINALVOLUME) %>% colMeans(., na.rm = TRUE),
  M2 = plxf %>% filter(TREATMENT == "CTL") %>% filter(W7VOLUMES >= 7) %>%
  distinct(TUMORID, .keep_all = TRUE) %>%
  ungroup() %>% select(FINALVOLUME) %>% colMeans(., na.rm = TRUE),
  S1 = plxf %>% filter(TREATMENT == "PLX") %>% filter(W7VOLUMES >= 7) %>%

```

```

distinct(TUMORID, .keep_all = TRUE) %>%
ungroup() %>% select(FINALVOLUME) %>% sapply(., sd, na.rm = TRUE),
S2 = plxf %>% filter(TREATMENT == "CTL") %>% filter(W7VOLUMES >= 7) %>%
distinct(TUMORID, .keep_all = TRUE) %>%
ungroup() %>% select(FINALVOLUME) %>% sapply(., sd, na.rm = TRUE)
)

plxpwr$d = (plxpwr$M1 - plxpwr$M2) / sqrt(((plxpwr$S1 ^ 2) + (plxpwr$S2 ^
2)) / 2)

print("Post-hoc power calculation based on calculated effect size")

```

```
## [1] "Post-hoc power calculation based on calculated effect size"
```

```

pwr.t2n.test(plxpwr$n1 ,
plxpwr$n2 ,
plxpwr$d,
sig.level = 0.05,
power = NULL)

```

```

##
##      t test power calculation
##
##          n1 = 27
##          n2 = 25
##          d = 0.2892803
##      sig.level = 0.05
##          power = 0.1756415
##      alternative = two.sided

```

```
print("a priori sample size calculation based on calculated effect size")
```

```
## [1] "a priori sample size calculation based on calculated effect size"
```

```

pwr.t.test(n = NULL,
plxpwr$d,
sig.level = 0.05,
power = 0.80)

```

```

##
##      Two-sample t test power calculation
##
##          n = 188.5505
##          d = 0.2892803
##      sig.level = 0.05
##          power = 0.8
##      alternative = two.sided
##
## NOTE: n is number in *each* group

```

```

plxpwr <- plxpwr %>% mutate(
  n1.SM01 = plxf %>% filter(TREATMENT == "PLX") %>% filter(MODEL == "SM01") %>%
  ungroup() %>% filter(W7VOLUMES >= 7) %>%
  distinct(TUMORID, .keep_all = TRUE) %>% select(FINALVOLUME) %>% nrow(),
  n2.SM01 = plxf %>% filter(TREATMENT == "CTL") %>% filter(MODEL == "SM01") %>%
  ungroup() %>% filter(W7VOLUMES >= 7) %>%
  distinct(TUMORID, .keep_all = TRUE) %>% select(FINALVOLUME) %>% nrow(),
  M1.SM01 = plxf %>% filter(TREATMENT == "PLX") %>% filter(MODEL == "SM01") %>%
  ungroup() %>% filter(W7VOLUMES >= 7) %>%
  distinct(TUMORID, .keep_all = TRUE) %>% select(FINALVOLUME) %>%
  colMeans(., na.rm = TRUE),
  M2.SM01 = plxf %>% filter(TREATMENT == "CTL") %>% filter(MODEL == "SM01") %>%
  ungroup() %>% filter(W7VOLUMES >= 7) %>%
  distinct(TUMORID, .keep_all = TRUE) %>% select(FINALVOLUME) %>%
  colMeans(., na.rm = TRUE),
  S1.SM01 = plxf %>% filter(TREATMENT == "PLX") %>% filter(MODEL == "SM01") %>%
  ungroup() %>% filter(W7VOLUMES >= 7) %>%
  distinct(TUMORID, .keep_all = TRUE) %>% select(FINALVOLUME) %>%
  sapply(., sd, na.rm = TRUE),
  S2.SM01 = plxf %>% filter(TREATMENT == "CTL") %>% filter(MODEL == "SM01") %>%
  ungroup() %>% filter(W7VOLUMES >= 7) %>%
  distinct(TUMORID, .keep_all = TRUE) %>% select(FINALVOLUME) %>%
  sapply(., sd, na.rm = TRUE)
)

plxpwr <-
plxpwr %>%
mutate(d.SM01 = (plxpwr$M1.SM01 - plxpwr$M2.SM01) / sqrt(((plxpwr$S1.SM01 ^
2) + (plxpwr$S2.SM01 ^ 2)) / 2))

print("Post-hoc power calculation based on calculated effect size")

```

```
## [1] "Post-hoc power calculation based on calculated effect size"
```

```

pwr.t2n.test(
  plxpwr$n1.SM01 ,
  plxpwr$n2.SM01 ,
  plxpwr$d.SM01,
  sig.level = 0.05,
  power = NULL
)

```

```

##
##      t test power calculation
##
##          n1 = 13
##          n2 = 13
##          d = 0.03746594
##      sig.level = 0.05
##          power = 0.05096509
##      alternative = two.sided

```

```

print("a priori sample size calculation based on calculated effect size")

## [1] "a priori sample size calculation based on calculated effect size"

pwr.t.test(n = NULL,
plxpwr$d.SM01,
sig.level = 0.05,
power = 0.80)

##
##      Two-sample t test power calculation
##
##              n = 11184.09
##              d = 0.03746594
##      sig.level = 0.05
##      power     = 0.8
##      alternative = two.sided
##
## NOTE: n is number in *each* group

plxpwr <- plxpwr %>% mutate(
  n1.SM05 = plxf %>% filter(TREATMENT == "PLX") %>% filter(MODEL == "SM05") %>%
  ungroup() %>% filter(W7VOLUMES >= 7) %>%
  distinct(TUMORID, .keep_all = TRUE) %>% select(FINALVOLUME) %>% nrow(),
  n2.SM05 = plxf %>% filter(TREATMENT == "CTL") %>% filter(MODEL == "SM05") %>%
  ungroup() %>% filter(W7VOLUMES >= 7) %>%
  distinct(TUMORID, .keep_all = TRUE) %>% select(FINALVOLUME) %>% nrow(),
  M1.SM05 = plxf %>% filter(TREATMENT == "PLX") %>% filter(MODEL == "SM05") %>%
  ungroup() %>% filter(W7VOLUMES >= 7) %>%
  distinct(TUMORID, .keep_all = TRUE) %>% select(FINALVOLUME) %>%
  colMeans(., na.rm = TRUE),
  M2.SM05 = plxf %>% filter(TREATMENT == "CTL") %>% filter(MODEL == "SM05") %>%
  ungroup() %>% filter(W7VOLUMES >= 7) %>%
  distinct(TUMORID, .keep_all = TRUE) %>% select(FINALVOLUME) %>%
  colMeans(., na.rm = TRUE),
  S1.SM05 = plxf %>% filter(TREATMENT == "PLX") %>% filter(MODEL == "SM05") %>%
  ungroup() %>% filter(W7VOLUMES >= 7) %>%
  distinct(TUMORID, .keep_all = TRUE) %>% select(FINALVOLUME) %>%
  sapply(., sd, na.rm = TRUE),
  S2.SM05 = plxf %>% filter(TREATMENT == "CTL") %>% filter(MODEL == "SM05") %>%
  ungroup() %>% filter(W7VOLUMES >= 7) %>%
  distinct(TUMORID, .keep_all = TRUE) %>% select(FINALVOLUME) %>%
  sapply(., sd, na.rm = TRUE)
)

plxpwr <-
plxpwr %>%
mutate(d.SM05 = (plxpwr$M1.SM05 - plxpwr$M2.SM05) / sqrt(((plxpwr$S1.SM05 ^
2) + (plxpwr$S2.SM05 ^ 2)) / 2))

print("Post-hoc power calculation based on calculated effect size")

```

```
## [1] "Post-hoc power calculation based on calculated effect size"
```

```
pwr.t2n.test(  
  plxpwr$n1.SM05 ,  
  plxpwr$n2.SM05 ,  
  plxpwr$d.SM05,  
  sig.level = 0.05,  
  power = NULL  
)
```

```
##  
##      t test power calculation  
##  
##          n1 = 14  
##          n2 = 12  
##          d = 0.5239419  
##      sig.level = 0.05  
##          power = 0.2485027  
##      alternative = two.sided
```

```
print("a priori sample size calculation based on calculated effect size")
```

```
## [1] "a priori sample size calculation based on calculated effect size"
```

```
pwr.t.test(n = NULL,  
  plxpwr$d.SM05,  
  sig.level = 0.05,  
  power = 0.80)
```

```
##  
##      Two-sample t test power calculation  
##  
##          n = 58.15957  
##          d = 0.5239419  
##      sig.level = 0.05  
##          power = 0.8  
##      alternative = two.sided  
##  
## NOTE: n is number in *each* group
```

## Reclassification of PLX5622 preclinical trial data using trained LDA classifier

LDA criteria produce similar results to empirical classification

```
pplxreg <- predict(object = reg, newdata = plxf)  
  
plxf$LDA_PREDICTION = pplxreg$class
```



```

plxregplot.CTL <- plxf %>% filter(TREATMENT == "CTL") %>%
  ggplot() +
  aes(x = W7VOLUMES, y = VOLUMECHANGE, color = LDA_PREDICTION) +
  geom_point(size = 5,
             shape = 21,
             stroke = 1) +
  plottheme +
  theme(legend.position = "none") +
  scale_color_manual("LDA Prediction", values = c("red", "blue")) +
  scale_shape("Outcome") +
  guides(color = guide_legend(order = 2),
         shape = guide_legend(order = 1)) +
  xlab(bquote(bold('W7 Tumor Volume' ~ (mm ^ 3)))) +
  ylab(bquote(bold('Volume Change' ~ (mm ^ 3)))) +
  facet_wrap( ~ MODEL,
            labeller = labeller(MODEL = modellabels),
            scales = "free") +
  scale_x_continuous(limits = c(0, 50)) +
  scale_y_continuous(limits = c(-20, 50)) +
  theme(strip.text = element_text(face = "bold.italic")) +
  geom_vline(xintercept = 7, linetype = "dashed")

```

plxregplot.CTL

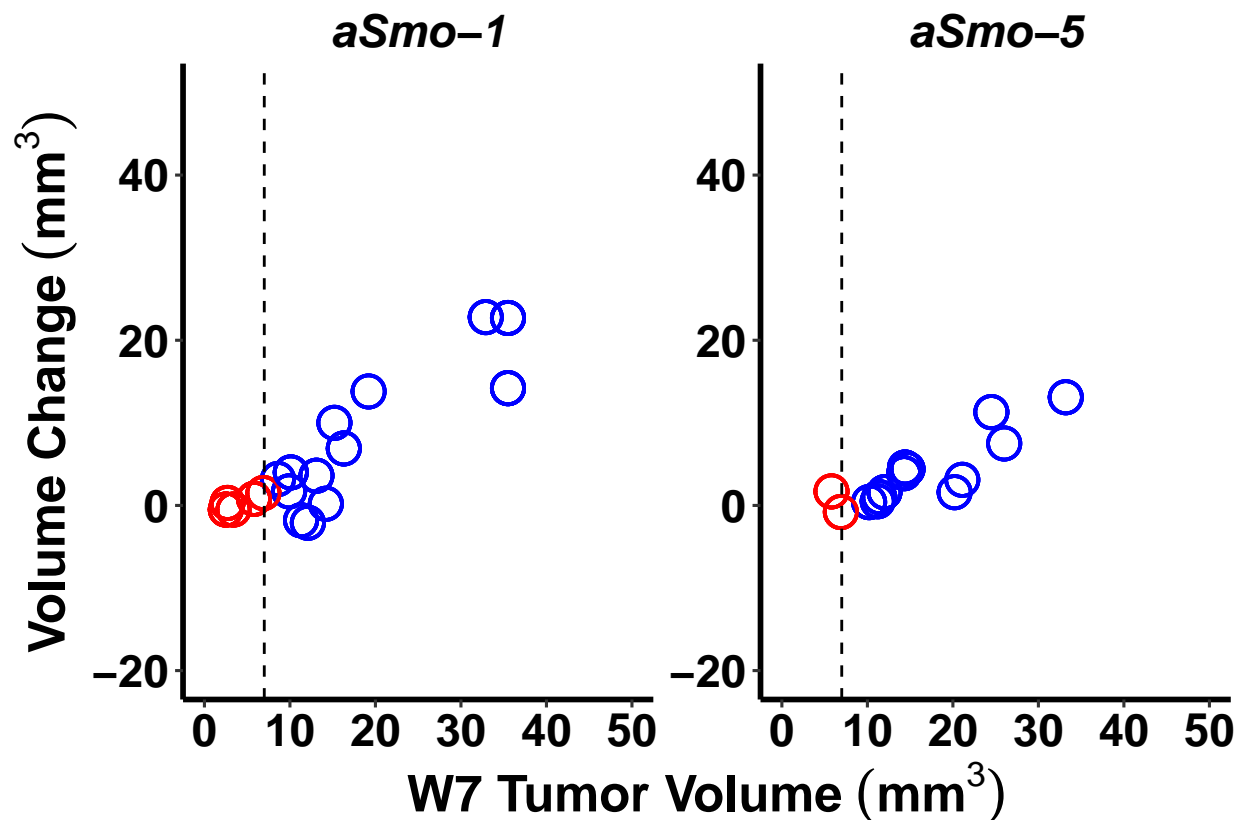

```

plxregplot.PLX <- plxf %>% filter(TREATMENT == "PLX") %>%
  ggplot() +
  aes(x = W7VOLUMES, y = VOLUMECHANGE, color = LDA_PREDICTION) +
  geom_point(size = 5,
  shape = 21,
  stroke = 1) +
  plottheme +
  theme(legend.position = "none") +
  scale_color_manual("LDA Prediction", values = c("red", "blue")) +
  scale_shape("Outcome") +
  guides(color = guide_legend(order = 2),
  shape = guide_legend(order = 1)) +
  xlab(bquote(bold('W7 Tumor Volume' ~ (mm ^ 3)))) +
  ylab(bquote(bold('Volume Change' ~ (mm ^ 3)))) +
  facet_wrap( ~ MODEL,
  labeller = labeller(MODEL = modellabels),
  scales = "free") +
  scale_x_continuous(limits = c(0, 50)) +
  scale_y_continuous(limits = c(-20, 50)) +
  theme(strip.text = element_text(face = "bold.italic")) +
  geom_vline(xintercept = 7, linetype = "dashed")

```

plxregplot.PLX

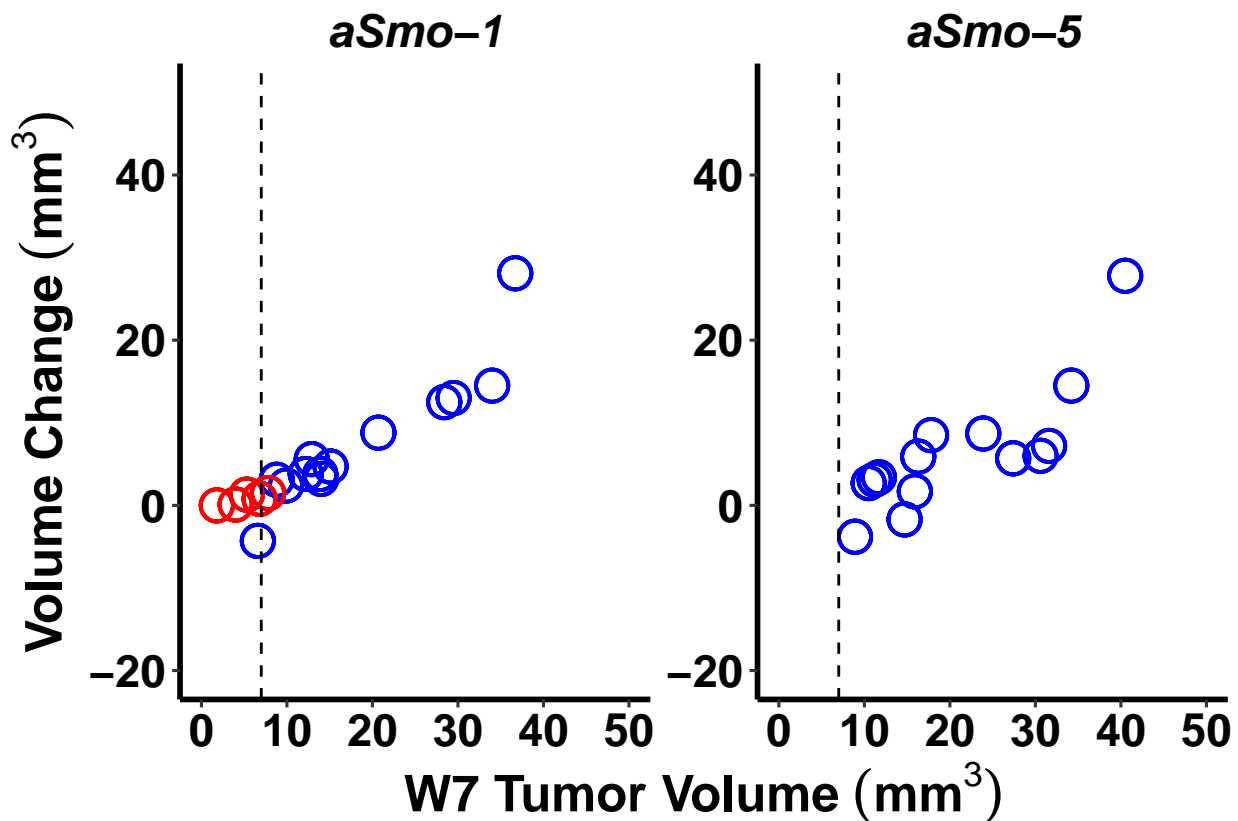

```

plxregplot.U <-
  plxf %>% filter(TREATMENT == "U") %>%
  filter(W7VOLUMES != 0, VOLUMECHANGE != 0) %>%

```

```

ggplot() +
  aes(x = W7VOLUMES, y = VOLUMECHANGE, color = LDA_PREDICTION) +
  geom_point(size = 5,
             shape = 21,
             stroke = 1) +
  plottheme +
  theme(legend.position = "none") +
  scale_color_manual("LDA Prediction", values = c("red", "blue")) +
  scale_shape("Outcome") +
  guides(color = guide_legend(order = 2),
         shape = guide_legend(order = 1)) +
  xlab(bquote(bold('W7 Tumor Volume' ~ (mm ^ 3)))) +
  ylab(bquote(bold('Volume Change' ~ (mm ^ 3)))) +
  facet_wrap( ~ MODEL,
            labeller = labeller(MODEL = modellabels),
            scales = "free") +
  scale_x_continuous(limits = c(0, 20)) +
  scale_y_continuous(limits = c(-5, 7)) +
  theme(strip.text = element_text(face = "bold.italic")) +
  geom_vline(xintercept = 7, linetype = "dashed")

```

plxregplot.U

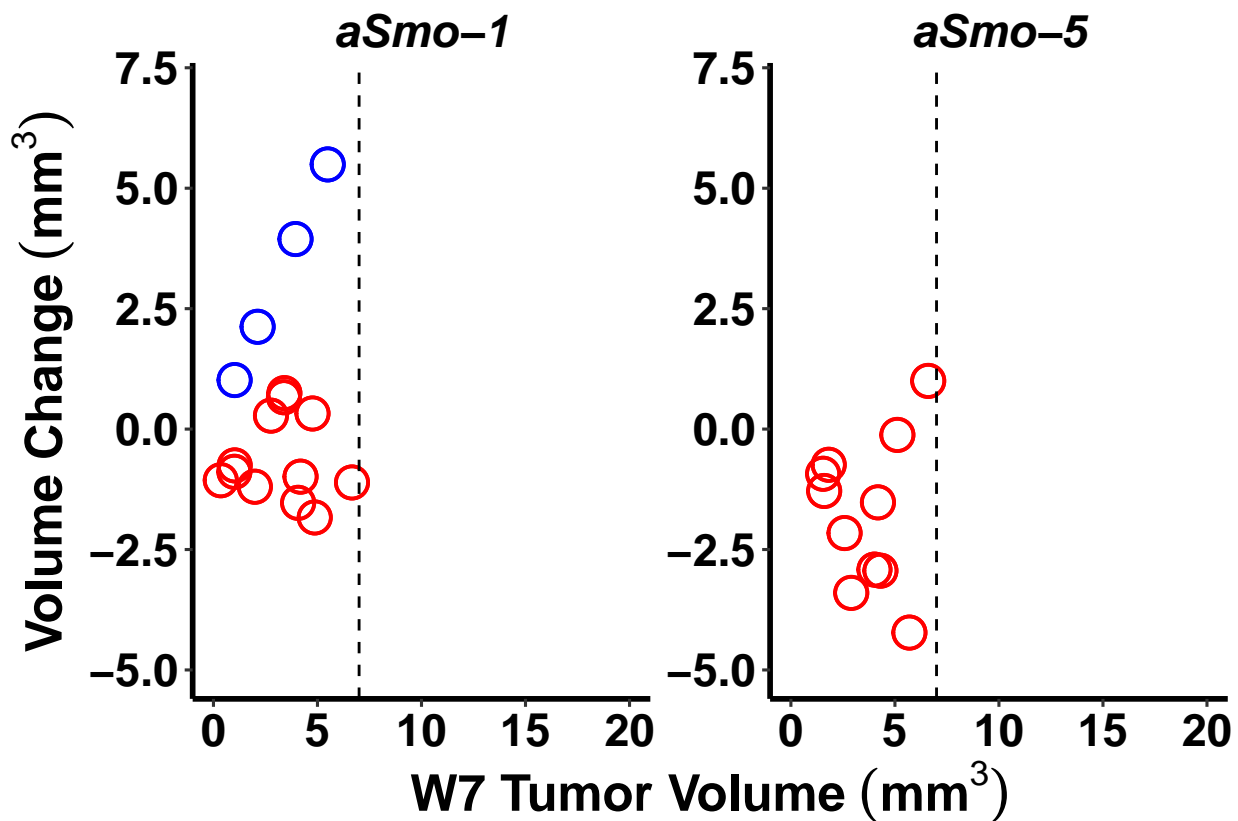

## Effects of treatment on endpoint tumor volume after LDA reclassification

```
plxldamodel <-
  plxf %>% filter(TREATMENT != "U") %>%
  filter(CLASSES != "falsely included") %>% filter(LDA_PREDICTION !=
  "Non-progressing") %>% filter(TIMEPOINT == 5 |
  TIMEPOINT == 6) %>% lmerTest::lmer(FINALVOLUME ~ W7VOLUMES + MODEL:TREATMENT + (1 |
  MOUSEID) + 0, data = .)

plxldamodel %>% summary(., ddf = "Kenward-Roger")
```

```
## Linear mixed model fit by REML. t-tests use Kenward-Roger's method [
## lmerModLmerTest]
## Formula: FINALVOLUME ~ W7VOLUMES + MODEL:TREATMENT + (1 | MOUSEID) + 0
## Data: .
##
## REML criterion at convergence: 463.4
##
## Scaled residuals:
##   Min       1Q   Median       3Q      Max
## -1.2516 -0.6056 -0.1824  0.1160  2.7621
##
## Random effects:
## Groups Name Variance Std.Dev.
## MOUSEID (Intercept) 100.7 10.04
## Residual 666.8 25.82
## Number of obs: 52, groups: MOUSEID, 29
##
## Fixed effects:
## Estimate Std. Error df t value Pr(>|t|)
## W7VOLUMES 1.4284 0.4432 45.4212 3.223 0.00235 **
## MODELSM01:TREATMENTCTL 2.5058 11.3055 37.7510 0.222 0.82579
## MODELSM05:TREATMENTCTL 8.3323 11.5359 34.6293 0.722 0.47497
## MODELSM01:TREATMENTPLX -1.1603 11.5989 34.0899 -0.100 0.92090
## MODELSM05:TREATMENTPLX -11.8751 12.2216 34.3714 -0.972 0.33801
## ---
## Signif. codes: 0 '***' 0.001 '**' 0.01 '*' 0.05 '.' 0.1 ' ' 1
##
## Correlation of Fixed Effects:
## W7VOLU MODELSM01:TREATMENTC MODELSM05:TREATMENTC
## MODELSM01:TREATMENTC -0.684
## MODELSM05:TREATMENTC -0.665 0.455
## MODELSM01:TREATMENTP -0.696 0.476 0.463
## MODELSM05:TREATMENTP -0.750 0.513 0.499
## MODELSM01:TREATMENTP
## MODELSM01:TREATMENTC
## MODELSM05:TREATMENTC
## MODELSM01:TREATMENTP
## MODELSM05:TREATMENTP 0.522
```

## Statistical power calculations after LDA reclassification

```
plxldapwr <- data.frame(  
  n1 = plxf %>%  
  filter(TREATMENT == "PLX", LDA_PREDICTION != "Non-progressing") %>%  
  distinct(TUMORID, .keep_all = TRUE) %>%  
  ungroup() %>% select(FINALVOLUME) %>% nrow(),  
  n2 = plxf %>%  
  filter(TREATMENT == "CTL", LDA_PREDICTION != "Non-progressing") %>%  
  distinct(TUMORID, .keep_all = TRUE) %>%  
  ungroup() %>% select(FINALVOLUME) %>% nrow(),  
  M1 = plxf %>%  
  filter(TREATMENT == "PLX", LDA_PREDICTION != "Non-progressing") %>%  
  distinct(TUMORID, .keep_all = TRUE) %>%  
  ungroup() %>% select(FINALVOLUME) %>%  
  colMeans(., na.rm = TRUE),  
  M2 = plxf %>%  
  filter(TREATMENT == "CTL", LDA_PREDICTION != "Non-progressing") %>%  
  distinct(TUMORID, .keep_all = TRUE) %>%  
  ungroup() %>% select(FINALVOLUME) %>%  
  colMeans(., na.rm = TRUE),  
  S1 = plxf %>%  
  filter(TREATMENT == "PLX", LDA_PREDICTION != "Non-progressing") %>%  
  distinct(TUMORID, .keep_all = TRUE) %>%  
  ungroup() %>% select(FINALVOLUME) %>%  
  sapply(., sd, na.rm = TRUE),  
  S2 = plxf %>%  
  filter(TREATMENT == "CTL", LDA_PREDICTION != "Non-progressing") %>%  
  distinct(TUMORID, .keep_all = TRUE) %>%  
  ungroup() %>% select(FINALVOLUME) %>%  
  sapply(., sd, na.rm = TRUE)  
)  
  
plxldapwr$d = (plxldapwr$M1 - plxldapwr$M2) / sqrt(((plxldapwr$S1 ^ 2) +  
(plxldapwr$S2 ^ 2)) / 2)  
  
print("Post-hoc power calculation based on calculated effect size after LDA")
```

```
## [1] "Post-hoc power calculation based on calculated effect size after LDA"
```

```
pwr.t2n.test(plxldapwr$n1 ,  
  plxldapwr$n2 ,  
  plxldapwr$d,  
  sig.level = 0.05,  
  power = )
```

```
##  
##      t test power calculation  
##  
##          n1 = 27  
##          n2 = 25  
##          d = 0.3140286
```

```
##      sig.level = 0.05
##      power = 0.1986766
##      alternative = two.sided
```

```
print("a priori sample size calculation based on calculated effect size after LDA")
```

```
## [1] "a priori sample size calculation based on calculated effect size after LDA"
```

```
pwr.t.test(n = NULL,
plxldapwr$d,
sig.level = 0.05,
power = 0.80)
```

```
##
##      Two-sample t test power calculation
##
##      n = 160.1496
##      d = 0.3140286
##      sig.level = 0.05
##      power = 0.8
##      alternative = two.sided
##
## NOTE: n is number in *each* group
```

```
plxldapwr <- plxldapwr %>% mutate(
  n1.SM01 = plxf %>%
  filter(TREATMENT == "PLX", LDA_PREDICTION != "Non-progressing") %>%
  filter(MODEL == "SM01") %>% distinct(TUMORID, .keep_all = TRUE) %>%
  ungroup() %>% select(FINALVOLUME) %>% nrow(),
  n2.SM01 = plxf %>%
  filter(TREATMENT == "CTL", LDA_PREDICTION != "Non-progressing") %>%
  filter(MODEL == "SM01") %>% distinct(TUMORID, .keep_all = TRUE) %>%
  ungroup() %>% select(FINALVOLUME) %>% nrow(),
  M1.SM01 = plxf %>%
  filter(TREATMENT == "PLX", LDA_PREDICTION != "Non-progressing") %>%
  filter(MODEL == "SM01") %>% distinct(TUMORID, .keep_all = TRUE) %>%
  ungroup() %>% select(FINALVOLUME) %>% colMeans(., na.rm = TRUE),
  M2.SM01 = plxf %>%
  filter(TREATMENT == "CTL", LDA_PREDICTION != "Non-progressing") %>%
  filter(MODEL == "SM01") %>% distinct(TUMORID, .keep_all = TRUE) %>%
  ungroup() %>% select(FINALVOLUME) %>% colMeans(., na.rm = TRUE),
  S1.SM01 = plxf %>%
  filter(TREATMENT == "PLX", LDA_PREDICTION != "Non-progressing") %>%
  filter(MODEL == "SM01") %>% distinct(TUMORID, .keep_all = TRUE) %>%
  ungroup() %>% select(FINALVOLUME) %>% sapply(., sd, na.rm = TRUE),
  S2.SM01 = plxf %>%
  filter(TREATMENT == "CTL", LDA_PREDICTION != "Non-progressing") %>%
  filter(MODEL == "SM01") %>% distinct(TUMORID, .keep_all = TRUE) %>%
  ungroup() %>% select(FINALVOLUME) %>% sapply(., sd, na.rm = TRUE)
)

plxldapwr <-
```

```
plxldapwr %>% mutate(d.SM01 = (plxldapwr$M1.SM01 - plxldapwr$M2.SM01) /
sqrt(((plxldapwr$S1.SM01 ^ 2) + (plxldapwr$S2.SM01 ^ 2)
) / 2))
```

```
print("Post-hoc power calculation based on calculated effect size")
```

```
## [1] "Post-hoc power calculation based on calculated effect size"
```

```
pwr.t2n.test(
plxldapwr$n1.SM01 ,
plxldapwr$n2.SM01 ,
plxldapwr$d.SM01,
sig.level = 0.05,
power = NULL
)
```

```
##
##      t test power calculation
##
##          n1 = 13
##          n2 = 13
##          d = 0.08953191
##      sig.level = 0.05
##          power = 0.05552609
##      alternative = two.sided
```

```
print("a priori sample size calculation based on calculated effect size")
```

```
## [1] "a priori sample size calculation based on calculated effect size"
```

```
pwr.t.test(n = NULL,
plxldapwr$d.SM01,
sig.level = 0.05,
power = 0.80)
```

```
##
##      Two-sample t test power calculation
##
##          n = 1959.268
##          d = 0.08953191
##      sig.level = 0.05
##          power = 0.8
##      alternative = two.sided
##
## NOTE: n is number in *each* group
```

```
plxldapwr <- plxldapwr %>% mutate(
n1.SM05 = plxf %>%
filter(TREATMENT == "PLX", LDA_PREDICTION != "Non-progressing") %>%
```

```

filter(MODEL == "SM05") %>% distinct(TUMORID, .keep_all = TRUE) %>%
ungroup() %>% select(FINALVOLUME) %>% nrow(),
n2.SM05 = plxf %>%
filter(TREATMENT == "CTL", LDA_PREDICTION != "Non-progressing") %>%
filter(MODEL == "SM05") %>% distinct(TUMORID, .keep_all = TRUE) %>%
ungroup() %>% select(FINALVOLUME) %>% nrow(),
M1.SM05 = plxf %>%
filter(TREATMENT == "PLX", LDA_PREDICTION != "Non-progressing") %>%
filter(MODEL == "SM05") %>% distinct(TUMORID, .keep_all = TRUE) %>%
ungroup() %>% select(FINALVOLUME) %>% colMeans(., na.rm = TRUE),
M2.SM05 = plxf %>%
filter(TREATMENT == "CTL", LDA_PREDICTION != "Non-progressing") %>%
filter(MODEL == "SM05") %>% distinct(TUMORID, .keep_all = TRUE) %>%
ungroup() %>% select(FINALVOLUME) %>% colMeans(., na.rm = TRUE),
S1.SM05 = plxf %>%
filter(TREATMENT == "PLX", LDA_PREDICTION != "Non-progressing") %>%
filter(MODEL == "SM05") %>% distinct(TUMORID, .keep_all = TRUE) %>%
ungroup() %>% select(FINALVOLUME) %>% sapply(., sd, na.rm = TRUE),
S2.SM05 = plxf %>%
filter(TREATMENT == "CTL", LDA_PREDICTION != "Non-progressing") %>%
filter(MODEL == "SM05") %>% distinct(TUMORID, .keep_all = TRUE) %>%
ungroup() %>% select(FINALVOLUME) %>% sapply(., sd, na.rm = TRUE)
)

plxldapwr <-
plxldapwr %>% mutate(d.SM05 = (plxldapwr$M1.SM05 - plxldapwr$M2.SM05) /
sqrt(((plxldapwr$S1.SM05 ^ 2) + (plxldapwr$S2.SM05 ^ 2)
) / 2))

print("Post-hoc power calculation based on calculated effect size")

```

```
## [1] "Post-hoc power calculation based on calculated effect size"
```

```

pwr.t2n.test(
  plxldapwr$n1.SM05 ,
  plxldapwr$n2.SM05 ,
  plxldapwr$d.SM05,
  sig.level = 0.05,
  power = NULL
)

```

```

##
##      t test power calculation
##
##          n1 = 14
##          n2 = 12
##          d = 0.5239419
##      sig.level = 0.05
##          power = 0.2485027
##      alternative = two.sided

```



```
print("a priori sample size calculation based on calculated effect size")
```

```
## [1] "a priori sample size calculation based on calculated effect size"
```

```
pwr.t.test(n = NULL,  
plxldapwr$d.SM05,  
sig.level = 0.05,  
power = 0.80)
```

```
##  
##      Two-sample t test power calculation  
##  
##              n = 58.15957  
##              d = 0.5239419  
##      sig.level = 0.05  
##              power = 0.8  
##      alternative = two.sided  
##  
## NOTE: n is number in *each* group
```
